RESEARCH ARTICLE

# Free amino acid and acylcarnitine values in *Ursus americanus* Pallas 1780 (black bear) from Northeastern Mexico

Andres Abellan-Borja<sup>1</sup>\*, Iram P. Rodriguez-Sanchez<sup>1</sup>\*, Rogelio Carrera-Treviño<sup>2</sup>, Olga Karina Villanueva-Segura<sup>1</sup>, Patricio Adrian Zapata-Morin<sup>1</sup>, Laura E. Martinez-de-Villareal<sup>3</sup>, Luis Javier Barboza-Aranda<sup>2</sup>, Mayra A. Gomez-Govea<sup>1</sup>, Margarita L. Martinez-Fierro<sup>4</sup>, Ivan Delgado-Enciso<sup>5,6</sup>, Gabriel Ruiz-Ayma<sup>7</sup>, Jose Ignacio Gonzalez-Rojas<sup>7\*</sup>, Antonio Guzman-Velasco<sup>1b,7\*</sup>

**1** Facultad de Ciencias Biológicas, Laboratorio de Fisiología Molecular y Estructural, Universidad Autonoma de Nuevo Leon, San Nicolas de los Garza, Mexico, **2** Facultad de Medicina Veterinaria y Zootecnia, Laboratorio de Vida Silvestre, Universidad Autonoma de Nuevo Leon, General Escobedo, Mexico, **3** Departamento de Genetica, Facultad de Medicina, Universidad Autonoma de Nuevo Leon, Monterrey, Mexico, **4** Laboratorio de Medicina Molecular, Universidad Autonoma de Zacatecas, Zacatecas, Mexico, **5** Universidad de Colima, Colima, Mexico, **6** Secretaria de Salud de Colima, Instituto Estatal de Cancer, Colima, Mexico, **7** Facultad de Ciencias Biologicas, Laboratorio de Conservacion de Vida Silvestre y Desarrollo Sustentable, Universidad Autonoma de Nuevo Leon, San Nicolas de los Garza, Mexico

\* These authors contributed equally to this work.

\* [antonio.guzman@uanl.mx](mailto:antonio.guzman@uanl.mx) (AGV); [josgonza@gmail.com](mailto:josgonza@gmail.com) (JIGR)

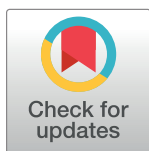

## OPEN ACCESS

**Citation:** Abellan-Borja A, Rodriguez-Sanchez IP, Carrera-Treviño R, Villanueva-Segura OK, Zapata-Morin PA, Martinez-de-Villareal LE, et al. (2023) Free amino acid and acylcarnitine values in *Ursus americanus* Pallas 1780 (black bear) from Northeastern Mexico. PLoS ONE 18(2): e0272979. <https://doi.org/10.1371/journal.pone.0272979>

**Editor:** Sylvain Giroud, University of Veterinary Medicine Vienna: Veterinarmedizinische Universitat Wien, AUSTRIA

**Received:** September 10, 2021

**Accepted:** July 29, 2022

**Published:** February 3, 2023

**Copyright:** © 2023 Abellan-Borja et al. This is an open access article distributed under the terms of the [Creative Commons Attribution License](https://creativecommons.org/licenses/by/4.0/), which permits unrestricted use, distribution, and reproduction in any medium, provided the original author and source are credited.

**Data Availability Statement:** All relevant data are within the manuscript and its [Supporting information](#) files.

**Funding:** The author(s) received no specific funding for this work.

**Competing interests:** The authors have declared that no competing interests exist.

## Abstract

### Introduction

*Ursus americanus* Pallas 1780 is the largest carnivore and the only ursid in Mexico. It is considered an endangered species in the country because its distribution and population have been reduced by up to 80% because of habitat loss or furtive hunting. These problems can lead to a diet change, which could result in metabolic disorders, such as fatty acid  $\beta$ -oxidation defects or organic acid metabolism disorders. In our study, a free amino acid and acylcarnitine profile was characterized.

### Methods

Peripheral blood samples were drawn from nine free-ranging black bears in a period of five months, from June to October of 2019 in Northeastern Mexico, and 12 amino acids and 30 acylcarnitines were determined and quantified. Age differences were observed in the samples through ANOVA and *post-hoc* Tukey test.

### Results

Only three metabolites showed a significant difference with age: alanine (Ala) [cubs vs juvenile], free-carnitine (C0) [juvenile vs cubs] and acetylcarnitine (C2) [cubs vs adults and juvenile vs cubs].

## Conclusion

Metabolites with variability due to age were identified, making them potential biomarkers to monitor metabolic status as early diagnosis in endangered species. This is the first study of black bear amino acid and acylcarnitine profiles, and the values found could be used as reference for free amino acid and acylcarnitine concentrations in further studies of the species.

## Introduction

The black bear (*Ursus americanus* Pallas, 1780) is a medium-sized bear with distribution in North America [1]. The International Union for Conservation of Nature (IUCN) considers the species in the category of Least Concern (LC) at the global level [2]. In Mexico, the black bear is considered an endangered and protected species according to NOM-059-SEMAR-NAT-2010 [3]. There are 16 subspecies identified in North America of which three inhabit Mexico (*U. a. eremicus* Merriam, 1904, *U. a. amblyceps* Baird, 1859 and *U. a. machetes* Elliot, 1903). These are distributed in the states of Sonora, Chihuahua, Coahuila, Nuevo Leon, Tamaulipas, Durango, Zacatecas, San Luis Potosi, Sinaloa, Nayarit and Aguascalientes [1, 4–6] (see S1 Fig, available online). There have been reports of population reduction due to increased anthropogenic pressures on wildlife, habitat destruction (e.g., agriculture and livestock production), loss of natural prey/foods and rapid urbanization [4, 7–9].

Some health complications have been reflected in bears as a result of human-animal interaction such as physiological consequences of consuming low-energy foods could be a response to anthropogenic activity [10] or black bears alter movements in response to anthropogenic features with time of day and season [11]. Furthermore, *U. americanus* can change its natural behavior by consuming food from anthropogenic sources, during hyperphagia period which is before wintering [12]. Numerous metabolic changes occur in certain physiological states in bears such as hibernation, during which time there is leucine synthesis, reduced glucose use and increased lipolysis [1]. Also, bears come into contact with other free-ranging animals, which could transmit pathogens that can cause changes in the bears' health [13]. An effective way of identifying metabolic disorders is by exploring free amino acids and acylcarnitine metabolites in blood using multianalyte technologies, such as tandem mass spectrometry (MS/MS) [14, 15]. The metabolic profile detects alterations in particular metabolic pathways, such as  $\beta$ -oxidation and organic acid metabolism disorders [16]. Free amino acid and acylcarnitine profiles have been used with different approaches to establish reference ranges in other organisms such as mosquitoes, rats, seals and horses [14, 16, 17]. A few studies in bear species such as *U. arctos* L (brown bear), have examined metabolite profiles, including lipids, bile acids, cortisol metabolites, acylcarnitines, amino acids, hydrogen sulfide and nitric oxide [18–21]. Metabolic profiles and the possible influence of exposure to pollutants have also been used in free-ranging polar bears (*Ursus maritimus* Phipps). In other hand, plasma amino acids and other metabolites like from Lipid and nitrogen have been studied in *U. americanus* during lactation [22–24]. Thus, it is hypothesized that the amino acid and acylcarnitine concentrations in the blood of black bear populations will differ. The aim of the present study was to establish free amino acid and acylcarnitine reference profiles through tandem mass spectrometry (MS/MS) [25, 26]. Learning about metabolic changes in an animal population is important to assess overall health, as well as determining possible infectious agents or metabolic disorders to understand the physiological response of wildlife to their environment. This is the first set of data on a free amino acid and acylcarnitine profile in black bears, making metabolomics potential tool for monitoring bear health.

## Material and methods

### Study area

The study area was the Northeastern zone of the geological province Sierra Madre Oriental (SMO) located in the states of Coahuila and Nuevo Leon (Mexico) (Fig 1) [27]. It is part of the drainage basin of the Bravo-Conchos River. The elevation ranges from 600 to 3,400 meters above sea level (m.a.s.l.). The vegetation is in accordance with the altitude: at the lowest elevation, there is microphyllous, rosetophile, “chaparral” and submontane shrub, and the middle elevation is predominated by oak forests and oak-pine forests, while the highest elevation is represented by coniferous forests [28].

### Sample collection

Blood samples were collected from June to October 2019 from nine free-ranging black bears in the states of Nuevo Leon and Coahuila, Mexico (7 ♂, 2 ♀; age range 1–8 years; weight range 35–111 kg). These black bears were captured because they came into conflict or contact with humans. All methods were carried out in accordance with regulations of the General Agency of Wildlife (DGVs, in Spanish) based on standard NOM-059-SEMARNAT-2010 concerned with Environmental Protection of Native Species of Mexico. DGVs authorized the collection and sampling of the specimens with permission No. SGPA/DGVs/002160/18. The capture procedure and sample collection consisted of placing bait (sardines) inside a Cambrian-type trap. To avoid injury to the bear during transport and handling, it was anesthetized with zolazepam [Zoletil® 100 (a combination of 50 mg/ml tiletamine and 50 mg/ml zolazepam, Virbac), Carros, France], which was administered with a pole syringe. The injected volume was based on weight and morphological size following the recommended doses (5 mg/kg) [29]. After the bear was anesthetized, respiratory rate, heart rate,

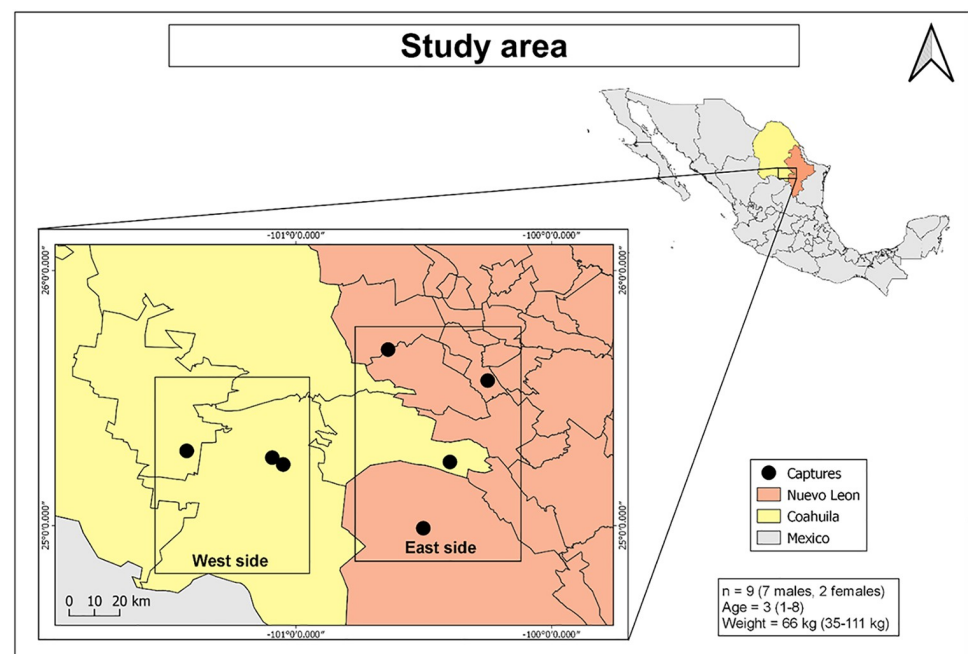

**Fig 1. Study area.** Coahuila (yellow) and Nuevo Leon (orange) states. In the lower right corner, information about the study population: sample size (n), median and range of age and weight. The figure was made in QGIS 3.10.10 suite (with CC BY 4.0 license) and loaded with INEGI (Instituto Nacional de Estadística y Geografía).

<https://doi.org/10.1371/journal.pone.0272979.g001>

body temperature and oxygen saturation were recorded every 10 minutes to ensure that these parameters were within the normal range [30]. Data including sex, age, weight, color and general measures were recorded during management (see S1 Table, available online). From the specimens, 3 mL of blood were collected in EDTA tubes (BD Vacutainer) from the femoral vein with a hypodermic needle.

After management, the bears were relocated to a nearby area where they could not cause problems with humans. Subsequently, blood samples were transported in a cooler with a refrigerant at 4°C to the Laboratorio de Fisiologia Molecular y Estructural at the Facultad de Ciencias Biologicas of the Universidad Autonoma de Nuevo Leon, where the samples were processed immediately upon arriving at the laboratory. The experimental protocols used in our study were approved by the Biosafety Committee of the Facultad de Medicina Veterinaria y Zootecnia of Universidad Autonoma de Nuevo Leon.

### Metabolomic analysis

Metabolomic analysis was done following a previously described procedure [15]. Each sample was analyzed to determine 12 amino acids and 31 acylcarnitines (see Table 1). A NeoBase non-derivatized MS/MS kit (PerkinElmer) was used to obtain the metabolites values, following the manufacturer's instructions [31]. A solution included in the kit containing internal standards labeled with stable isotopes was used to quantify the metabolites of interest. The samples were

**Table 1. Amino acid and acylcarnitine levels determined in blood samples of free-ranging *U. americanus* Pallas, 1780.** The column on the left lists the abbreviations of the metabolites analyzed. Mean, standard deviation (SD) and range (minimum and maximum) are shown.

| Metabolite    | Mean and SD (μmol/L) | Min (μmol/L) | Max (μmol/L) | Metabolite                           | Mean and SD (μmol/L) | Min (μmol/L) | Max (μmol/L) |
|---------------|----------------------|--------------|--------------|--------------------------------------|----------------------|--------------|--------------|
| Ala           | 307.569 ± 160.959    | 138.880      | 610.027      | C6                                   | 0.011 ± 0.002        | 0.010        | 0.015        |
| Arg           | 99.912 ± 24.24       | 57.485       | 124.693      | C6DC                                 | 0.049 ± 0.009        | 0.040        | 0.067        |
| Cit           | 37.334 ± 10.749      | 21.710       | 53.542       | C8                                   | 0.012 ± 0.003        | 0.010        | 0.020        |
| Gly           | 315.698 ± 111.128    | 139.520      | 457.193      | C8:1                                 | 0.007 ± 0.004        | 0.000        | 0.013        |
| Leu           | 144.661 ± 37.241     | 72.370       | 213.620      | C10                                  | 0.009 ± 0.002        | 0.005        | 0.010        |
| Met           | 6.955 ± 2.999        | 2.660        | 12.237       | C10:1                                | 0.004 ± 0.004        | 0.000        | 0.010        |
| Orn           | 46.234 ± 14.053      | 16.363       | 62.977       | C10:2                                | 0.003 ± 0.003        | 0.000        | 0.010        |
| Phe           | 55.47 ± 11.965       | 37.407       | 75.233       | C12                                  | 0.01 ± 0.001         | 0.008        | 0.010        |
| Pro           | 93.196 ± 29.411      | 44.710       | 136.157      | C12:1                                | 0.009 ± 0.001        | 0.007        | 0.010        |
| Tyr           | 37.241 ± 8.268       | 22.250       | 52.770       | (C14)                                | 0.034 ± 0.012        | 0.010        | 0.047        |
| Val           | 119.681 ± 38.136     | 50.940       | 190.400      | Tetradecenoylcarnitine (C14:1)       | 0.018 ± 0.004        | 0.010        | 0.023        |
| SA            | 0.323 ± 0.042        | 0.255        | 0.405        | Tetradecadienoylcarnitine (C14:2)    | 0.008 ± 0.002        | 0.003        | 0.010        |
| C0            | 10.888 ± 3.838       | 5.920        | 16.588       | Hexadecanoylcarnitine (C16)          | 0.306 ± 0.135        | 0.058        | 0.560        |
| C2            | 4.572 ± 1.886        | 2.483        | 8.792        | Hexadecenoylcarnitine (C16:1)        | 0.053 ± 0.024        | 0.013        | 0.097        |
| C3            | 0.229 ± 0.072        | 0.143        | 0.373        | 3-OH-hexadecenoylcarnitine (C16:1OH) | 0.028 ± 0.014        | 0.010        | 0.053        |
| C3DC<br>+C4OH | 0.028 ± 0.01         | 0.017        | 0.050        | 3-OH-hexadecanoylcarnitine (C16OH)   | 0.011 ± 0.002        | 0.010        | 0.013        |
| C4            | 0.352 ± 0.133        | 0.193        | 0.567        | Octadecanoylcarnitine (C18)          | 0.115 ± 0.042        | 0.068        | 0.220        |
| C4DC<br>+C5OH | 0.178 ± 0.023        | 0.150        | 0.220        | Octadecenoylcarnitine (C18:1)        | 0.325 ± 0.084        | 0.173        | 0.43         |
| C5            | 0.091 ± 0.028        | 0.057        | 0.137        | 3-OH-octadecenoylcarnitine (C18:1OH) | 0.013 ± 0.004        | 0.01         |              |
| C5:1          | 0.007 ± 0.003        | 0.003        | 0.010        | 3-OH-octadecadienoylcarn (C18:2)     | 0.111 ± 0.057        | 0.040        | 0.237        |
| C5DC<br>+C6OH | 0.067 ± 0.028        | 0.045        | 0.140        | 3-OH-octadecanoylcarnitine (C18OH)   | 0.005 ± 0.003        | 0.002        | 0.010        |

<https://doi.org/10.1371/journal.pone.0272979.t001>

analyzed in a mass spectrometer (TQD Waters). Sample analysis was performed with multiple-reaction monitoring using Maslynx Software.

### Statistical analysis

Data analysis was performed using R (<https://www.r-project.org/>) [32]. Raw measurements were normalized by sum of all values within a sample to 1, and data were then obtained by dividing each value by the sum of all values per sample. These normalized values were then converted to log base 2 to handle extreme values. A *t* test was used to determine statistically significant differences between groups. Age was divided into cub with 3 individuals (1–2 years), juvenile with 4 individuals (3–4 years) and adult with 2 individuals (8 years) [33], and ANOVA ( $p \leq 0.05$ ) and *post-hoc* Tukey test were performed. The heat maps are a graphic representation of the proportion of amino acids and acylcarnitines in the study groups. The heat maps were generated in the ggplot2 package of R software [34].

### Results

A total of 42 metabolites were analyzed, 12 amino acids and 30 acylcarnitines. Reference ranges were also established in peripheral blood in free-ranging black bears. Means, standard deviations and ranges of 42 metabolites are shown in Table 1. Amino acids with low concentrations were succinylacetone (SA) and methionine (Met) with values of 0.323  $\mu\text{mol/L}$  (range 0.255–0.405  $\mu\text{mol/L}$ ) and 6.955  $\mu\text{mol/L}$  (range 2.660–12.237  $\mu\text{mol/L}$ ), respectively; acylcarnitines with low concentrations were decenoyl-carnitine (C10:1) and decadienoyl-carnitine (C10:2) with values of 0.004  $\mu\text{mol/L}$  (range 0.000–0.010  $\mu\text{mol/L}$ ) and 0.003  $\mu\text{mol/L}$  (range 0.000–0.010  $\mu\text{mol/L}$ ), respectively. The amino acids with the highest concentrations were alanine (Ala) and glycine (Gly) at 307.569  $\mu\text{mol/L}$  (range 138.880–610.027  $\mu\text{mol/L}$ ) and 315.698  $\mu\text{mol/L}$  (range 139.520–457.193  $\mu\text{mol/L}$ ), and the acylcarnitines with the highest concentration were free carnitine (C0) and acetylcarnitine (C2) at 10.888  $\mu\text{mol/L}$  (range 5.920–16.588  $\mu\text{mol/L}$ ) and 4.572  $\mu\text{mol/L}$  (range 2.483–8.792  $\mu\text{mol/L}$ ), respectively.

Heat maps of the 42 metabolites by folds are represented in Fig 2, distinguished by age: cubs (0–2 years), juveniles (3–6 years), adults ( $\geq 7$  years). The yellow, green and purple colors mean high, medium and low metabolite concentrations. C10:2 showed the highest concentration in juvenile bears. ANOVA performed between different age groups of bears showed that there was a significant difference only in three metabolites, alanine (Ala), free carnitine (C0) and acetylcarnitine (C2) (Table 2).

### Discussion

Blood acylcarnitines are usually used to determine aberrations in mitochondrial  $\beta$ -oxidation of fatty acids, although little has been done in the determination of reference values in bears at different ages. Also, metabolite profiles determined by tandem MS have become a useful tool for detecting illnesses that have nonspecific signs and symptoms, and thus, an acylcarnitine profile can be beneficial in identifying fatty acid oxidation defects [15, 26]. Metabolite profiles in free-ranging bears have proven to be a powerful tool in detecting changes, such as in identifying the potential influence of contaminant exposure in two subpopulations of polar bears (*U. maritimus* Phipps) through isotope ratio mass spectrometry (IRMS) [22]. Another example of such was the determination of seasonal metabolic changes through the active phase and hibernation in the brown bear (*U. arctos* L), also using MS/MS as in the present study [20]; other techniques such as high-performance liquid chromatography (HPLC) have also been used in this type of study in bears [18]. It is relevant that although the Mexican black bear is an endangered species [3], no metabolomic studies have been done to establish a metabolic status. This



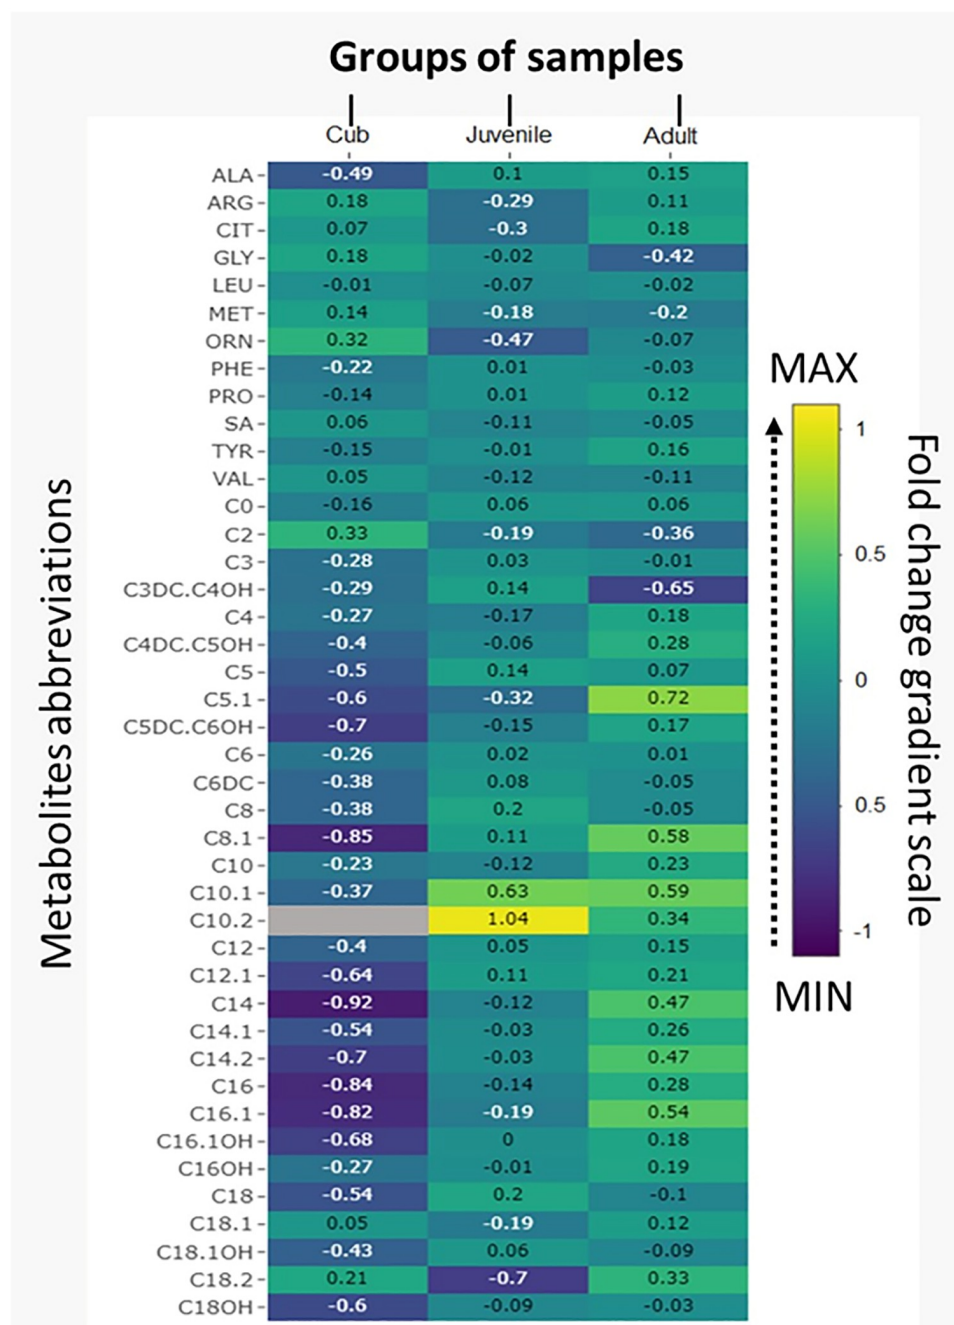

**Fig 2.** Heat map represents metabolites analyzed by folds in cubs (0–2 years), juveniles (3–6 years); adults ( $\geq 7$  years).

<https://doi.org/10.1371/journal.pone.0272979.g002>

is the first metabolite dataset (amino acids and acylcarnitine) determined in a Mexican *Ursus* species, and thus, means and SD of free amino acids and acylcarnitines in free-ranging black bears are reported (Table 1) for comparisons in further analyses with the same species, as it is believed that habitat loss, human population and trash in the suburbs will increase in the near future. Therefore, this is likely to affect the black bears' diet [6] and can be reflected in this kind of analysis [35].

**Table 2. Significant differences in amino acid and acylcarnitine reference values in blood samples of free-ranging *U. americanus* Pallas.** Comparative analysis between different ages of bears. The column on the left gives the abbreviations of the metabolites analyzed; comparisons between cub (1–2 years), juvenile (3–4 years) and adult (8 years) bears are shown. A significant difference was indicated by  $p < 0.05$ .

| Metabolite | Age             |         |
|------------|-----------------|---------|
|            | Comparison      | p-value |
| Ala        | Cub vs juvenile | 0.0096  |
| C0         | Juvenile vs cub | 0.0267  |
| C2         | Cub vs adult    | 0.0001  |
|            | Juvenile vs cub | 0.0016  |

<https://doi.org/10.1371/journal.pone.0272979.t002>

Acylcarnitine and amino acid levels have been reported in metabolic studies in humans; values are influenced by sex, age, diet and status at the moment of sample collection [17, 35–37]. We compared bear groups to examine differences by age. Studies in horses and humans showed significant differences between different ages [9, 38]. Similarly, we found here a significant difference in alanine (Ala), glycine (Gly) and acetyl carnitine (C2). This can be associated with differences in diet during the life of the bear, which is reflected in the amino acid and acylcarnitine profile [39–42]. Likewise, a significant difference was observed in three metabolites between ages, namely Ala, free carnitine (C0) and C2, especially in early ages from 1 to 2 years with respect to the others (3 to 4 and 8 years). Our results are like previous findings on mammals already mentioned. It is important to point out that decadienoyl carnitine (C10:2) was not detectable in 1- to 2-year-old bears (Fig 2); in humans, this acylcarnitine, when increased, is usually related to DCR 24-dienoyl-CoA reductase deficiency [37].

These findings can be useful to relate metabolites such as Ala, C0 and C2 to diet variations and can be the basis for detecting diet changes in the future. Amino acids play an important role in regulating food intake and nutrient metabolism in mammals [14]. Ala inhibits pyruvate kinase; therefore, it is responsible for regulating gluconeogenesis and glycolysis to ensure net glucose production during periods of food deprivation [43]. It has been proposed to be a nutritionally essential amino acid based on dietary intake of glycine and its need [44]. Individual acylcarnitines may imply changes in specific metabolic pathways, such as physiological and genetic mechanisms. In addition, regarding variation due to location, the variation factor in Ala, C0 and C2 can be referred to age in further studies. C2 is an acetylated form of carnitine that is synthesized naturally intra-mitochondrially, and it is involved in trans-mitochondrial membrane trafficking of acetyl units in many pathways, including glycogen, lipid and acetylcholine synthesis [45]. C2 increase is the result of  $\beta$ -oxidation because of fitness cost [16, 46], or if low, it can be related to a ketosis condition [36]. C0 is essential for the transfer of long-chain fatty acids through the inner mitochondrial membrane for  $\beta$ -oxidation, and it is known that in mammals, low levels of C0 are normally associated with primary carnitine deficiency [47]. It is important to mention that it is known that the blood concentration of these kinds of metabolites are regulated and stable in mammals, such as rats and humans [48]. Although a change in the concentration of the metabolites observed may be due to the change in diet during the different stages of the bear, subsequent studies should be carried out on their effect on metabolism.

In conclusion, free amino acid and acylcarnitine ranges were established for the first time in free-ranging black bears. Metabolites with variability due to diet and age were identified, making them potential biomarkers to monitor metabolic status for early diagnostic purposes in endangered species. Future comparisons with the ranges of amino acids and acylcarnitine established here, could lead to management measures. This is the first metabolomic analysis in

this species that is a useful way for health monitoring in this and other endangered species. It is important to increase sample numbers to identify those metabolites that vary due to a change in diet that could affect a species metabolic status.

## Supporting information

**S1 Fig.**  
(TIF)

**S1 Table.**  
(XLSX)

## Acknowledgments

Dr. A. Leyva (USA) helped with English editing of the manuscript. This scientific work was financially supported by resources from the FCB of the UANL.

## Author Contributions

**Conceptualization:** Iram P. Rodriguez-Sanchez, Rogelio Carrera-Treviño, Luis Javier Barboza-Aranda, Jose Ignacio Gonzalez-Rojas, Antonio Guzman-Velasco.

**Data curation:** Andres Abellan-Borja, Iram P. Rodriguez-Sanchez, Patricio Adrian Zapata-Morin, Mayra A. Gomez-Govea, Margarita L. Martinez-Fierro, Gabriel Ruiz-Ayma.

**Formal analysis:** Andres Abellan-Borja, Laura E. Martinez-de-Villareal, Ivan Delgado-Enciso.

**Investigation:** Iram P. Rodriguez-Sanchez, Rogelio Carrera-Treviño.

**Methodology:** Andres Abellan-Borja, Olga Karina Villanueva-Segura, Mayra A. Gomez-Govea, Margarita L. Martinez-Fierro.

**Project administration:** Antonio Guzman-Velasco.

**Resources:** Laura E. Martinez-de-Villareal.

**Software:** Patricio Adrian Zapata-Morin.

**Supervision:** Iram P. Rodriguez-Sanchez, Rogelio Carrera-Treviño, Luis Javier Barboza-Aranda, Margarita L. Martinez-Fierro, Gabriel Ruiz-Ayma, Jose Ignacio Gonzalez-Rojas, Antonio Guzman-Velasco.

**Validation:** Iram P. Rodriguez-Sanchez, Olga Karina Villanueva-Segura.

**Visualization:** Patricio Adrian Zapata-Morin.

**Writing – original draft:** Andres Abellan-Borja, Iram P. Rodriguez-Sanchez, Olga Karina Villanueva-Segura, Laura E. Martinez-de-Villareal, Luis Javier Barboza-Aranda, Antonio Guzman-Velasco.

**Writing – review & editing:** Iram P. Rodriguez-Sanchez, Rogelio Carrera-Treviño, Olga Karina Villanueva-Segura, Margarita L. Martinez-Fierro, Ivan Delgado-Enciso, Antonio Guzman-Velasco.

## References

1. Larivière S. *Ursus americanus*. Mammalian species. 2001; 647: 1–11. [https://doi.org/10.1644/1545-1410\(2001\)647<0001:UA>2.0.CO;2](https://doi.org/10.1644/1545-1410(2001)647<0001:UA>2.0.CO;2).



2. Garshelis DL, Scheick BK, Doan-Crider DL, Beecham JJ, Obbard ME. *Ursus americanus*. IUCN Red List of Threatened species. 2016; e.T41687A45034604. <http://dx.doi.org/10.2305/IUCN.UK.2016-3.RLTS.T41687A45034604.en>.
3. Secretaría de Medio Ambiente y Recursos Naturales, NOM-059-SEMARNAT-2010
4. Delfín-Alfonso CA, López-González CA, Lara-Díaz NE. El oso negro americano en el noroeste de México: recuperación de registros de ocurrencia. *Acta zoológica mexicana*. 2011; 27(3): 777–801. <https://doi.org/10.21829/azm.2011.273780>
5. Juárez-Casillas LA, Varas C. Evaluation of black bear (*Ursus americanus*) diet and consequences in its conservation in Sierra de Picachos, Nuevo León, Mexico. *Revista Mexicana de Biodiversidad*. 2013; 84(3): 970–976. <https://doi.org/10.7550/rmb.33376>
6. Servín J, Carreón-González D, Huerta-García A, Castro-Campos F, González-Saravia LF. Record of american black bear (*Ursus americanus*) in Durango, México. *Therya*. 2018; 9(3): 261–264. <https://doi.org/10.12933/therya-18-580>.
7. Gillman S. J., McKenney E. A., & Lafferty D. J. (2021). Human-provisioned foods reduce gut microbiome diversity in American black bears (*Ursus americanus*). *Journal of Mammalogy*.
8. Peyton, B. Spectacled bear conservation action plan. In: Servheen C, Herrero S, Peyton B. compilers. Bears. Status Survey and conservation action plan. IUCN/SSC. 1999. pp.157-198.<http://citeseerx.ist.psu.edu/viewdoc/download?doi=10.1.1.196.5692&rep=rep1&type=pdf>
9. Beckmann JP, Berger J. Rapid ecological and behavioural changes in carnivores: the responses of black bears (*Ursus americanus*) to altered food. *Journal of Zoology*. 2003; 261(2): 207–212. <https://doi.org/10.1017/S0952836903004126>
10. Christianson D, Coleman TH, Doan Q, Haroldson MA. Physiological consequences of consuming low-energy foods: herbivory coincides with a stress response in Yellowstone bears. *Conserv. Physiol*. 2021; 9:coab029. <https://doi.org/10.1093/conphys/coab029> PMID: 34345432
11. Zeller KA, Wattles DW, Conlee L, DeStefano S. Black bears alter movements in response to anthropogenic features with time of day and season. *Mov Ecol*. 2019. 11; 7:19. <https://doi.org/10.1186/s40462-019-0166-4> PMID: 31338195
12. Nuñez-Torres M., Zarco-González M. M., Monroy-Vilchis O., & Carrera-Treviño R. (2020). Human–black bear interactions in Northern Mexico. *Human Dimensions of Wildlife*, 25(5), 438–451.
13. Bronson E., Spiker H., & Driscoll C. P. (2014). Serosurvey for selected pathogens in free-ranging American black bears (*Ursus americanus*) in Maryland, USA. *Journal of wildlife diseases*, 50(4), 829–836. <https://doi.org/10.7589/2013-07-155> PMID: 25075540
14. Rodríguez-Sánchez IP, Treviño-Alvarado VM, Torres-Sepúlveda MR, López-Saldaña LA, Ponce-García G, López-Uriarte GA, et al. Reference values for amino acids and acylcarnitines in peripheral blood in Quarter horses and American miniature horses. *Acta Veterinaria Scandinavica*. 2015; 57:62. <https://doi.org/10.1186/s13028-015-0144-9> PMID: 26416518
15. Chace DH, Kalas TA, Naylor EW. Use of Tandem Mass Spectrometry for Multianalyte Screening of Dried Blood Specimens from Newborns. *Clinical Chemistry*. 2003; 49(11): 1797–1817. <https://doi.org/10.1373/clinchem.2003.022178> PMID: 14578311
16. Jones LL, McDonald DA, Borum PR. Acylcarnitines: Role in brain. *Progress in Lipid Research*. 2010; 49: 61–75. <https://doi.org/10.1016/j.plipres.2009.08.004> PMID: 19720082
17. Park A, Gomez-Govea MA, Lopez-Monroy B, Treviño-Alvarado VM, Torres-Sepúlveda MA, López-Uriarte GA, et al. Profiles of Amino Acids and Acylcarnitines Related with Insecticide Exposure in *Culex quinquefasciatus* (Say). *Plos One*. 2017; 12(1): e0169514. <https://doi.org/10.1371/journal.pone.0169514> PMID: 28085898
18. Stenvinkel P, Fröbert O, Anderstam B, Palm F, Eriksson M, Bragfors-Helin AC, et al. Metabolic Changes in Summer Active and Anuric Hibernating Free-Ranging Brown Bears (*Ursus arctos*). *Plos One*. 2013; 8(9): e72934. <https://doi.org/10.1371/journal.pone.0072934> PMID: 24039826
19. Revsbech IG, Shen X, Chakravarti R, Jensen FB, Thiel B, Evans AL, et al. Hydrogen sulfide and nitric oxide metabolites in the blood of free-ranging brown bears and their potential roles in hibernation. *Free Radical Biology and Medicine*. 2014; 73: 349–357. <https://doi.org/10.1016/j.freeradbiomed.2014.05.025> PMID: 24909614
20. Rode KD, Stricker CA, Erlenbach J, Robbins CT, Cherry SG, Newsome SD, et al. Isotopic Incorporation and the Effects of Fasting and Dietary Lipid Content on Isotopic Discrimination in Large Carnivorous Mammals. *Physiological and Biochemical Zoology*. 2016; 89(3): 182–197. <https://doi.org/10.1086/686490> PMID: 27153128
21. Sommer F, Ståhlman M, Ilkayeva O, Arnemo JM, Kindberg J, Josefsson J, et al. The Gut Microbiota Modulates Energy Metabolism in the Hibernating Brown Bear *Ursus arctos*. *Cell Reports*. 2016; 14(7): 1655–1661. <https://doi.org/10.1016/j.celrep.2016.01.026> PMID: 26854221

22. Morris AD, Letcher RJ, Dyck M, Chandramouli B, Cosgrove J. Concentrations of legacy and new contaminants are related to metabolite profiles in Hudson Bay polar bears. *Environmental Research*. 2019; 168: 364–374. <https://doi.org/10.1016/j.envres.2018.10.001> PMID: 30384230
23. Wright PA, Obbard ME, Battersby BJ, Felskie AK, LeBlanc PJ, Ballantyne JS. Lactation during Hibernation in Wild Black Bears: Effects on Plasma Amino Acids and Nitrogen Metabolites. *Physiological and Biochemical Zoology*. 1999; 72(5): 597–604. <https://doi.org/10.1086/316691> PMID: 10521327
24. LeBlanc PJ, Obbard M, Battersby BJ, Felskie AK, Brown L, Wright PA, et al. Correlations of plasma lipid metabolites with hibernation and lactation in wild black bears *Ursus americanus*. *J. Comp. Physiol B*. 2001; 171: 327–334. <https://doi.org/10.1007/s003600100180> PMID: 11409630
25. Mills LS, Soulé ME, Doak DF. The Keystone-species concept in Ecology and Conservation. *BioScience*. 1993; 43(4): 219–224. <https://doi.org/10.2307/1312122>.
26. Stenvinkel P, Jani AH, Johnson RJ. Hibernating bears (Ursidae): metabolic magicians of definite interest for the nephrologist. *Kidney International*. 2013; 83(2): 207–212. <https://doi.org/10.1038/ki.2012.396> PMID: 23254895
27. QGIS.org. QGIS Geographic Information System. Open Source Geospatial Foundation Project. 2020. <http://qgis.org>. Accessed November 05, 2020.
28. Valdez-Tamez V, Foroughbakhch R, De la Garza J. Criterios fitogeográficos en la redelimitación del Parque Nacional Cumbres de Monterrey. *Ciencia*. 2004; 7: 29–34. <http://eprints.uanl.mx/id/eprint/1607>
29. Carrera-Treviño, R. y I. Lira-Torres. 2015. Manual para resolver conflictos entre las actividades humanas y el oso negro (*Ursus americanus* Pallas, 1780) en el Parque Nacional Cumbres de Monterrey: Consideraciones técnicas para la prevención de daños, el uso de herramientas no letales y el manejo de ejemplares. Laboratorio de Fauna Silvestre, Facultad de Medicina Veterinaria y Zootecnia. Universidad Autónoma de Nuevo León, Parque Nacional Cumbres de Monterrey, Comisión Nacional de Áreas Naturales Protegidas, Protección de la Fauna Mexicana A.C.
30. Fowler ME, Miller RE. *Zoo and Animal Medicine. Current Therapy*. Saunders Elsevier. 2008.
31. Zheng Y, Chen Y, Qiu X, Chen W, Lin Q, Zeng Y, et al. 2019. A verification of the application of the non-derivatized mass spectrometry method in newborns screening of metabolic disorders. *Medicine (Baltimore)* 98(19):e15500. <https://doi.org/10.1097/MD.00000000000015500> PMID: 31083189
32. Team RStudio, RStudio: Integrated Development for R. RStudio. Boston, MA 2020. <http://www.rstudio.com/>
33. Oskam IC, Ropstad E, Dahl E, Lie E, Derocher AE, Wiig , et al. Organochlorines affect the major androgenic hormone, Testosterone, in Male Polar Bears (*Ursus maritimus*) at Svalbard. *Journal of Toxicology and Environmental Health, Part A*. 2003; 66(22): 2119–2139. <https://doi.org/10.1080/15287390390211342> PMID: 14710596
34. Wickham H. 2011. ggplot2, 3(2), 180–185.
35. Rinaldo P, Cowan TM, Matern D. Acylcarnitine profile analysis. *Genetics in Medicine*. 2008; 10: 151–156. <https://doi.org/10.1097/GIM.0b013e3181614289> PMID: 18281923
36. DePew CL, Thompson DL, Fernandez JM, Sticker LS, Burleigh DW. Changes in concentrations of hormones, metabolites, and amino acids in plasma of adult horses relative to overnight feed deprivation followed by a pellet-hay meal fed at noon. *Journal of Animal Science*. 1994; 72(6):1530–1539. <https://doi.org/10.2527/1994.7261530x> PMID: 8071178
37. Blau N, Duran M, Gibson KM. *Laboratory Guide to the Methods in Biochemical Genetics*. Springer-Verlag Berlin Heidelberg. 2008.
38. Ruiz M, Labarthe F, Fortier A, Bouchard B, Legault JT, Bolduc V, et al. Circulating acylcarnitine profile in human heart failure: a surrogate of fatty acid metabolic dysregulation in mitochondria and beyond. *Am J Physiol Heart Circ Physiol*. 2017; 313: H768–H781. <https://doi.org/10.1152/ajpheart.00820.2016> PMID: 28710072
39. CONABIO. Ficha de especies prioritarias. Oso negro (*ursus americanus*). México, 2012. <http://www.conanp.gob.mx/conanp/dominios/especies/WEB/docs/pace/PACE-OSO-NEGRO.pdf>. Accessed November 02, 2020.
40. Cespedes N, Valencia A, Echeverry CA, Arce-Plata MI, Colón C, Castiñeiras DE, et al. Reference values of amino acids, acylcarnitines and succinylacetone by tandem mass spectrometry for use in newborn screening in southwest Colombia. *Colombia Médica*. 2017; 48(3): 1657–9534. <https://doi.org/10.25100/cm.v48i3.2180> PMID: 29213153
41. Schooneman MG, Vaz FM, Houten SM, Soeters MR. Acylcarnitines Reflecting or Inflicting Insulin Resistance? *Diabetes*. 2013; 62:1–8. <https://doi.org/10.2337/db12-0466> PMID: 23258903
42. Pomar CA, Kuda O, Kopecky J, Rombaldova M, Castro H, Picó C, et al. Alterations in plasma acylcarnitine and amino acid profiles may indicate poor nutrition during the suckling period due to maternal intake

- of an unbalanced diet and may predict later metabolic dysfunction. *The FASEB Journal*. 2019; 33: 796–807. <https://doi.org/10.1096/fj.201800327RRR> PMID: 30080446
43. Wu G, Bazer FW, Dai Z, Li D, Wang J, Wu Z. Amino acid nutrition in animals: Protein synthesis and beyond. *Annual Review of Animal Biosciences*. 2014; 2: 387–417. <https://doi.org/10.1146/annurev-animal-022513-114113> PMID: 25384149
  44. Wu G. Functional Amino Acids in Growth, Reproduction, and Health. *Advances in Nutrition*. 2010; 1: 31–37. <https://doi.org/10.3945/an.110.1008> PMID: 22043449
  45. Scafidi S, Fiskum G, Lindauer SL, Bamford P, Shi D, Hopkins I, et al. Metabolism of acetyl-L-carnitine for energy and neurotransmitter synthesis in the immature rat brain. *Journal of Neurochemistry*. 114(3): 820–831. <https://doi.org/10.1111/j.1471-4159.2010.06807.x> PMID: 20477950
  46. Knott KK, Schenk P, Beyerlein S, Boyd D, Ylitalo GM, O'Hara TM. Blood-based biomarkers of selenium and thyroid status indicate possible adverse biological effects of mercury and polychlorinated biphenyls in Southern Beaufort Sea polar bears. *Environmental Research*. 2011; 111(8): 1124–1136. <https://doi.org/10.1016/j.envres.2011.08.009> PMID: 21903210
  47. Longo N, Frigeni M, Pasquali M. Carnitine transport and fatty acid oxidation. *Biochimica et Biophysica Acta (BBA)—Molecular Cell Research*. 2016; 1863(10): 2422–2435. <https://doi.org/10.1016/j.bbamcr.2016.01.023> PMID: 26828774
  48. Jeulin C, Lewin LM. Role of free L-carnitine and acetyl-L-carnitine in post-gonadal maturation of mammalian spermatozoa. *Human Reproduction Update*. 1996; 2(2): 87–102. <https://doi.org/10.1093/humupd/2.2.87> PMID: 9079406
